# Supplementary material for: The Advantage of Playing Home in NBA: Microscopic, Team-Specific and Evolving Features
Source: PubMed Central journal article supplement (PMC4807825; doi:10.1371/journal.pone.0152440), 2016-03-25
Supplement: pone.0152440.s003.pdf [file pone.0152440.s003.pdf]

# Seasons 2004-05 to 2013-14

Average score,  $S(t)$

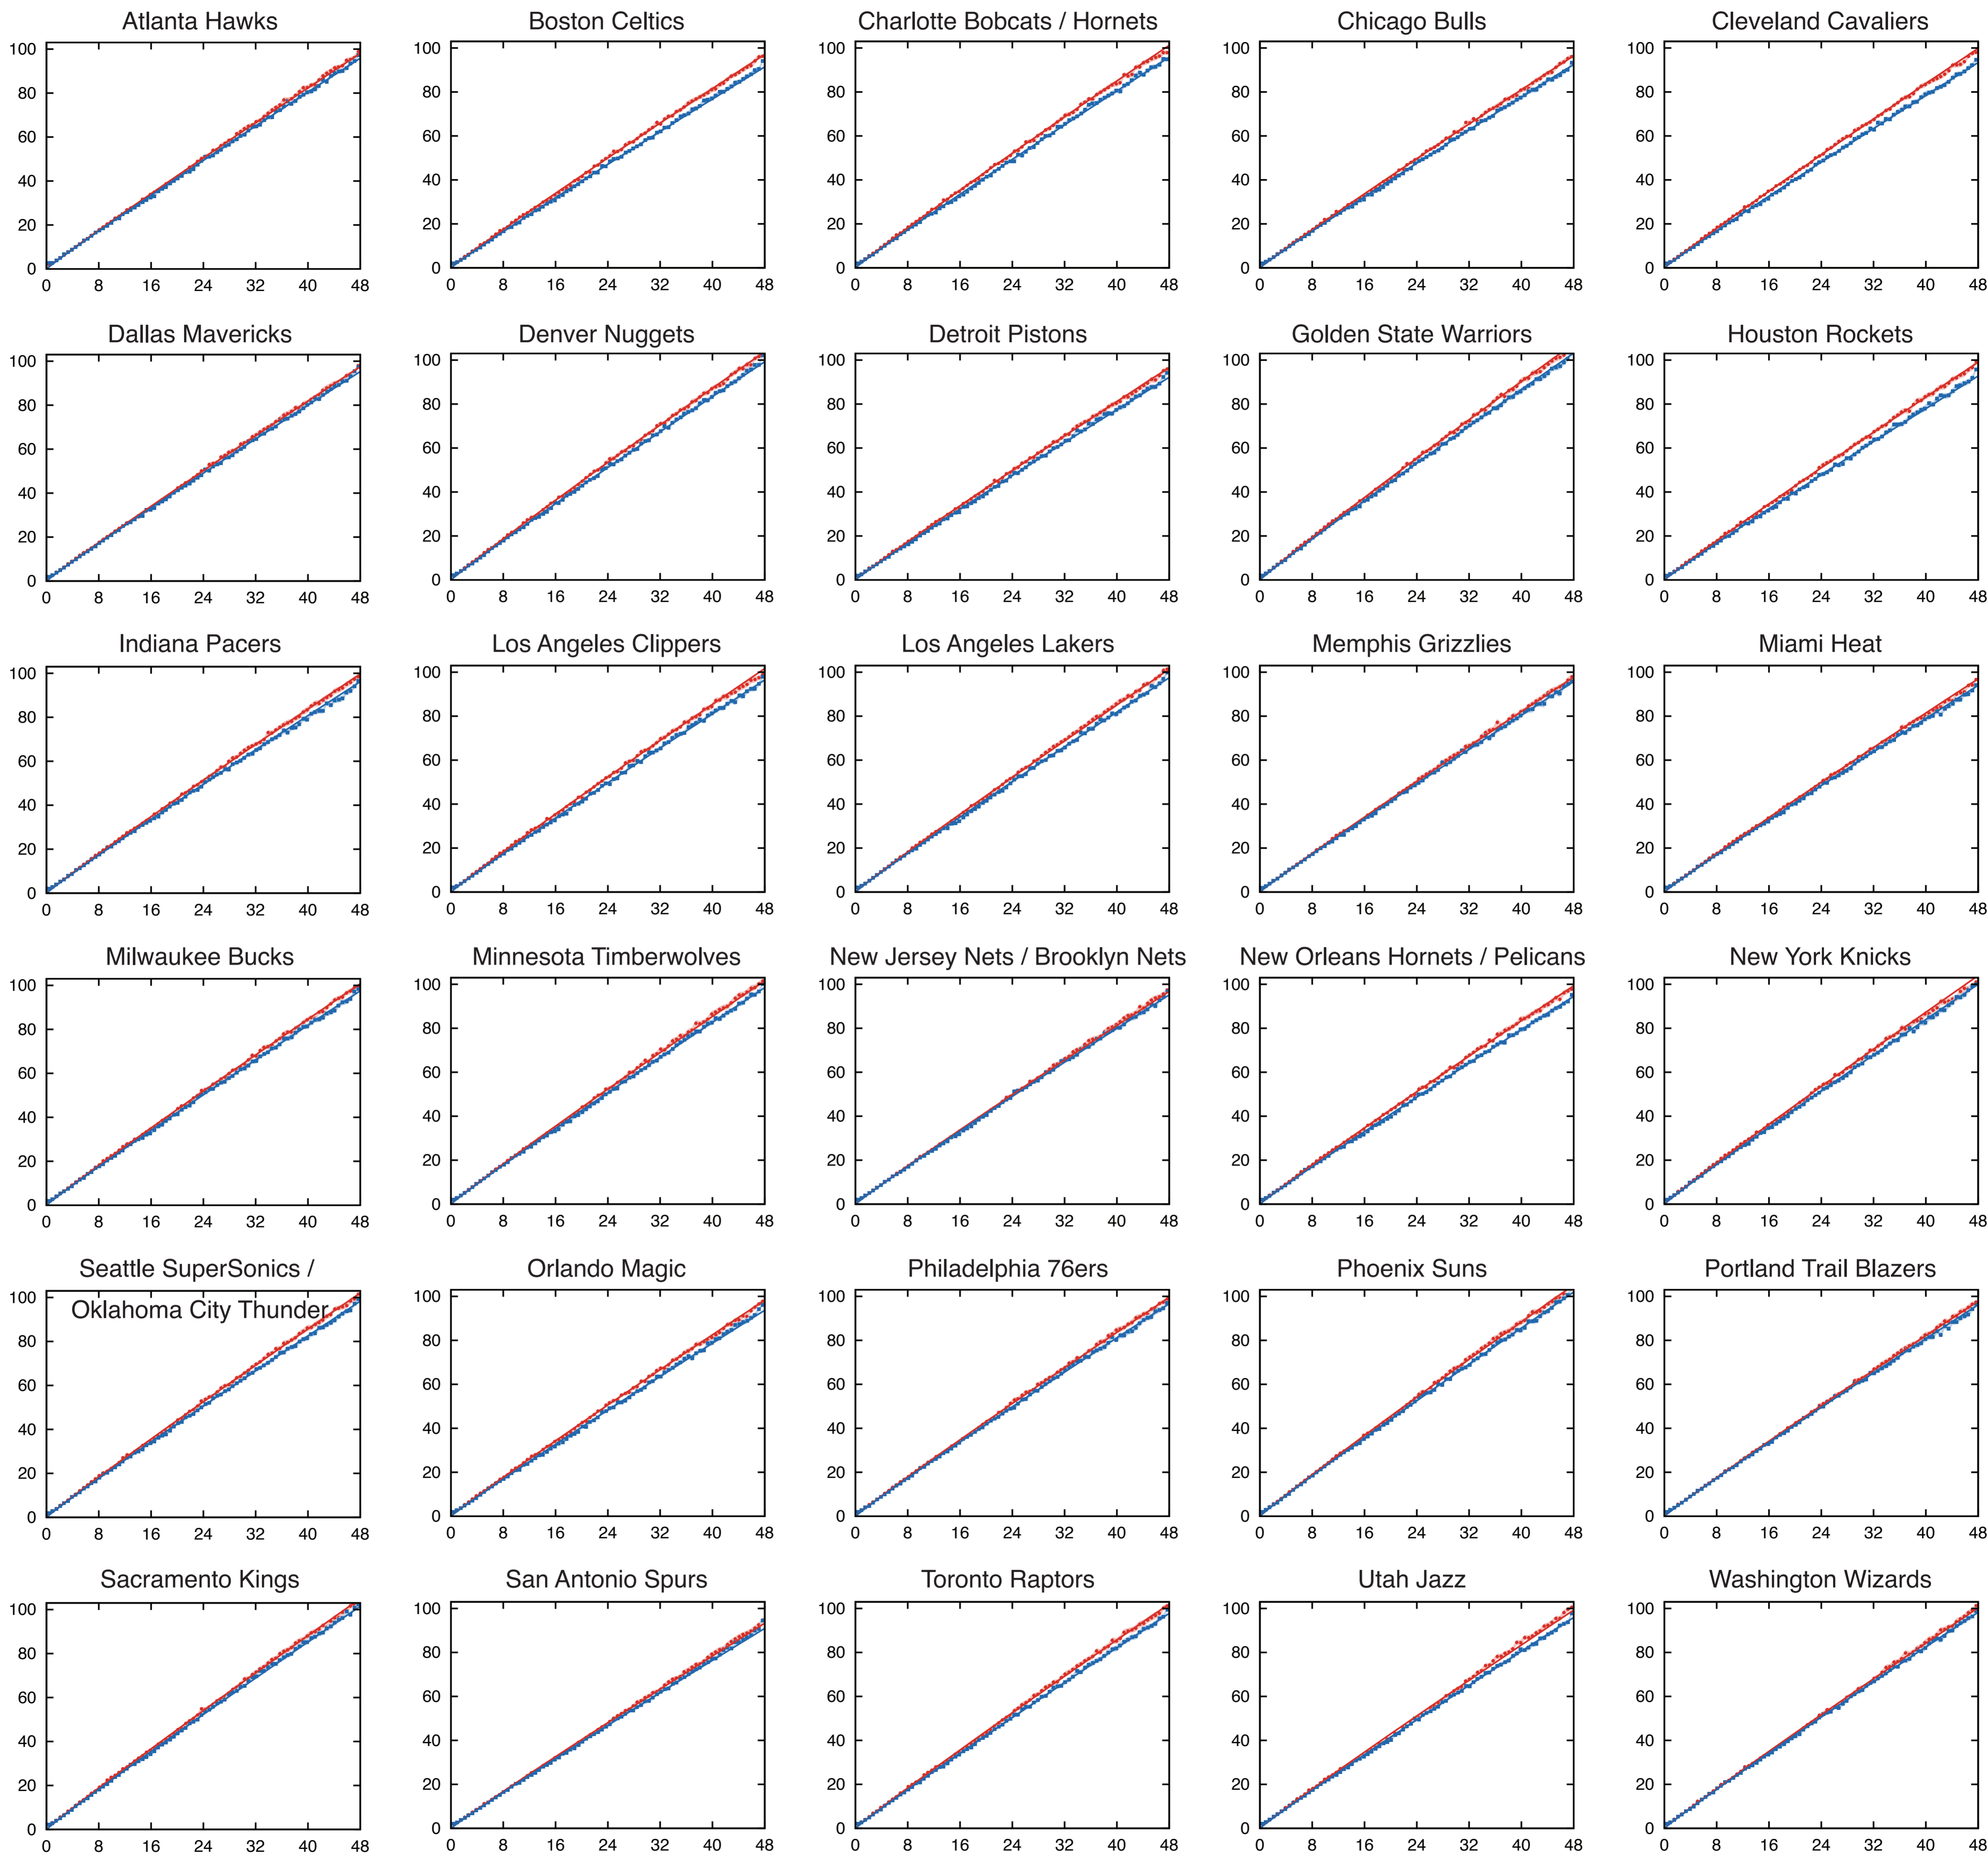

Playing home —●—  
Playing away —■—

Time,  $t$  (minutes)
