# Supplementary material for: The Advantage of Playing Home in NBA: Microscopic, Team-Specific and Evolving Features
Source: PubMed Central journal article supplement (PMC4807825; doi:10.1371/journal.pone.0152440), 2016-03-25
Supplement: pone.0152440.s005.pdf [file pone.0152440.s005.pdf]

# Second quarter

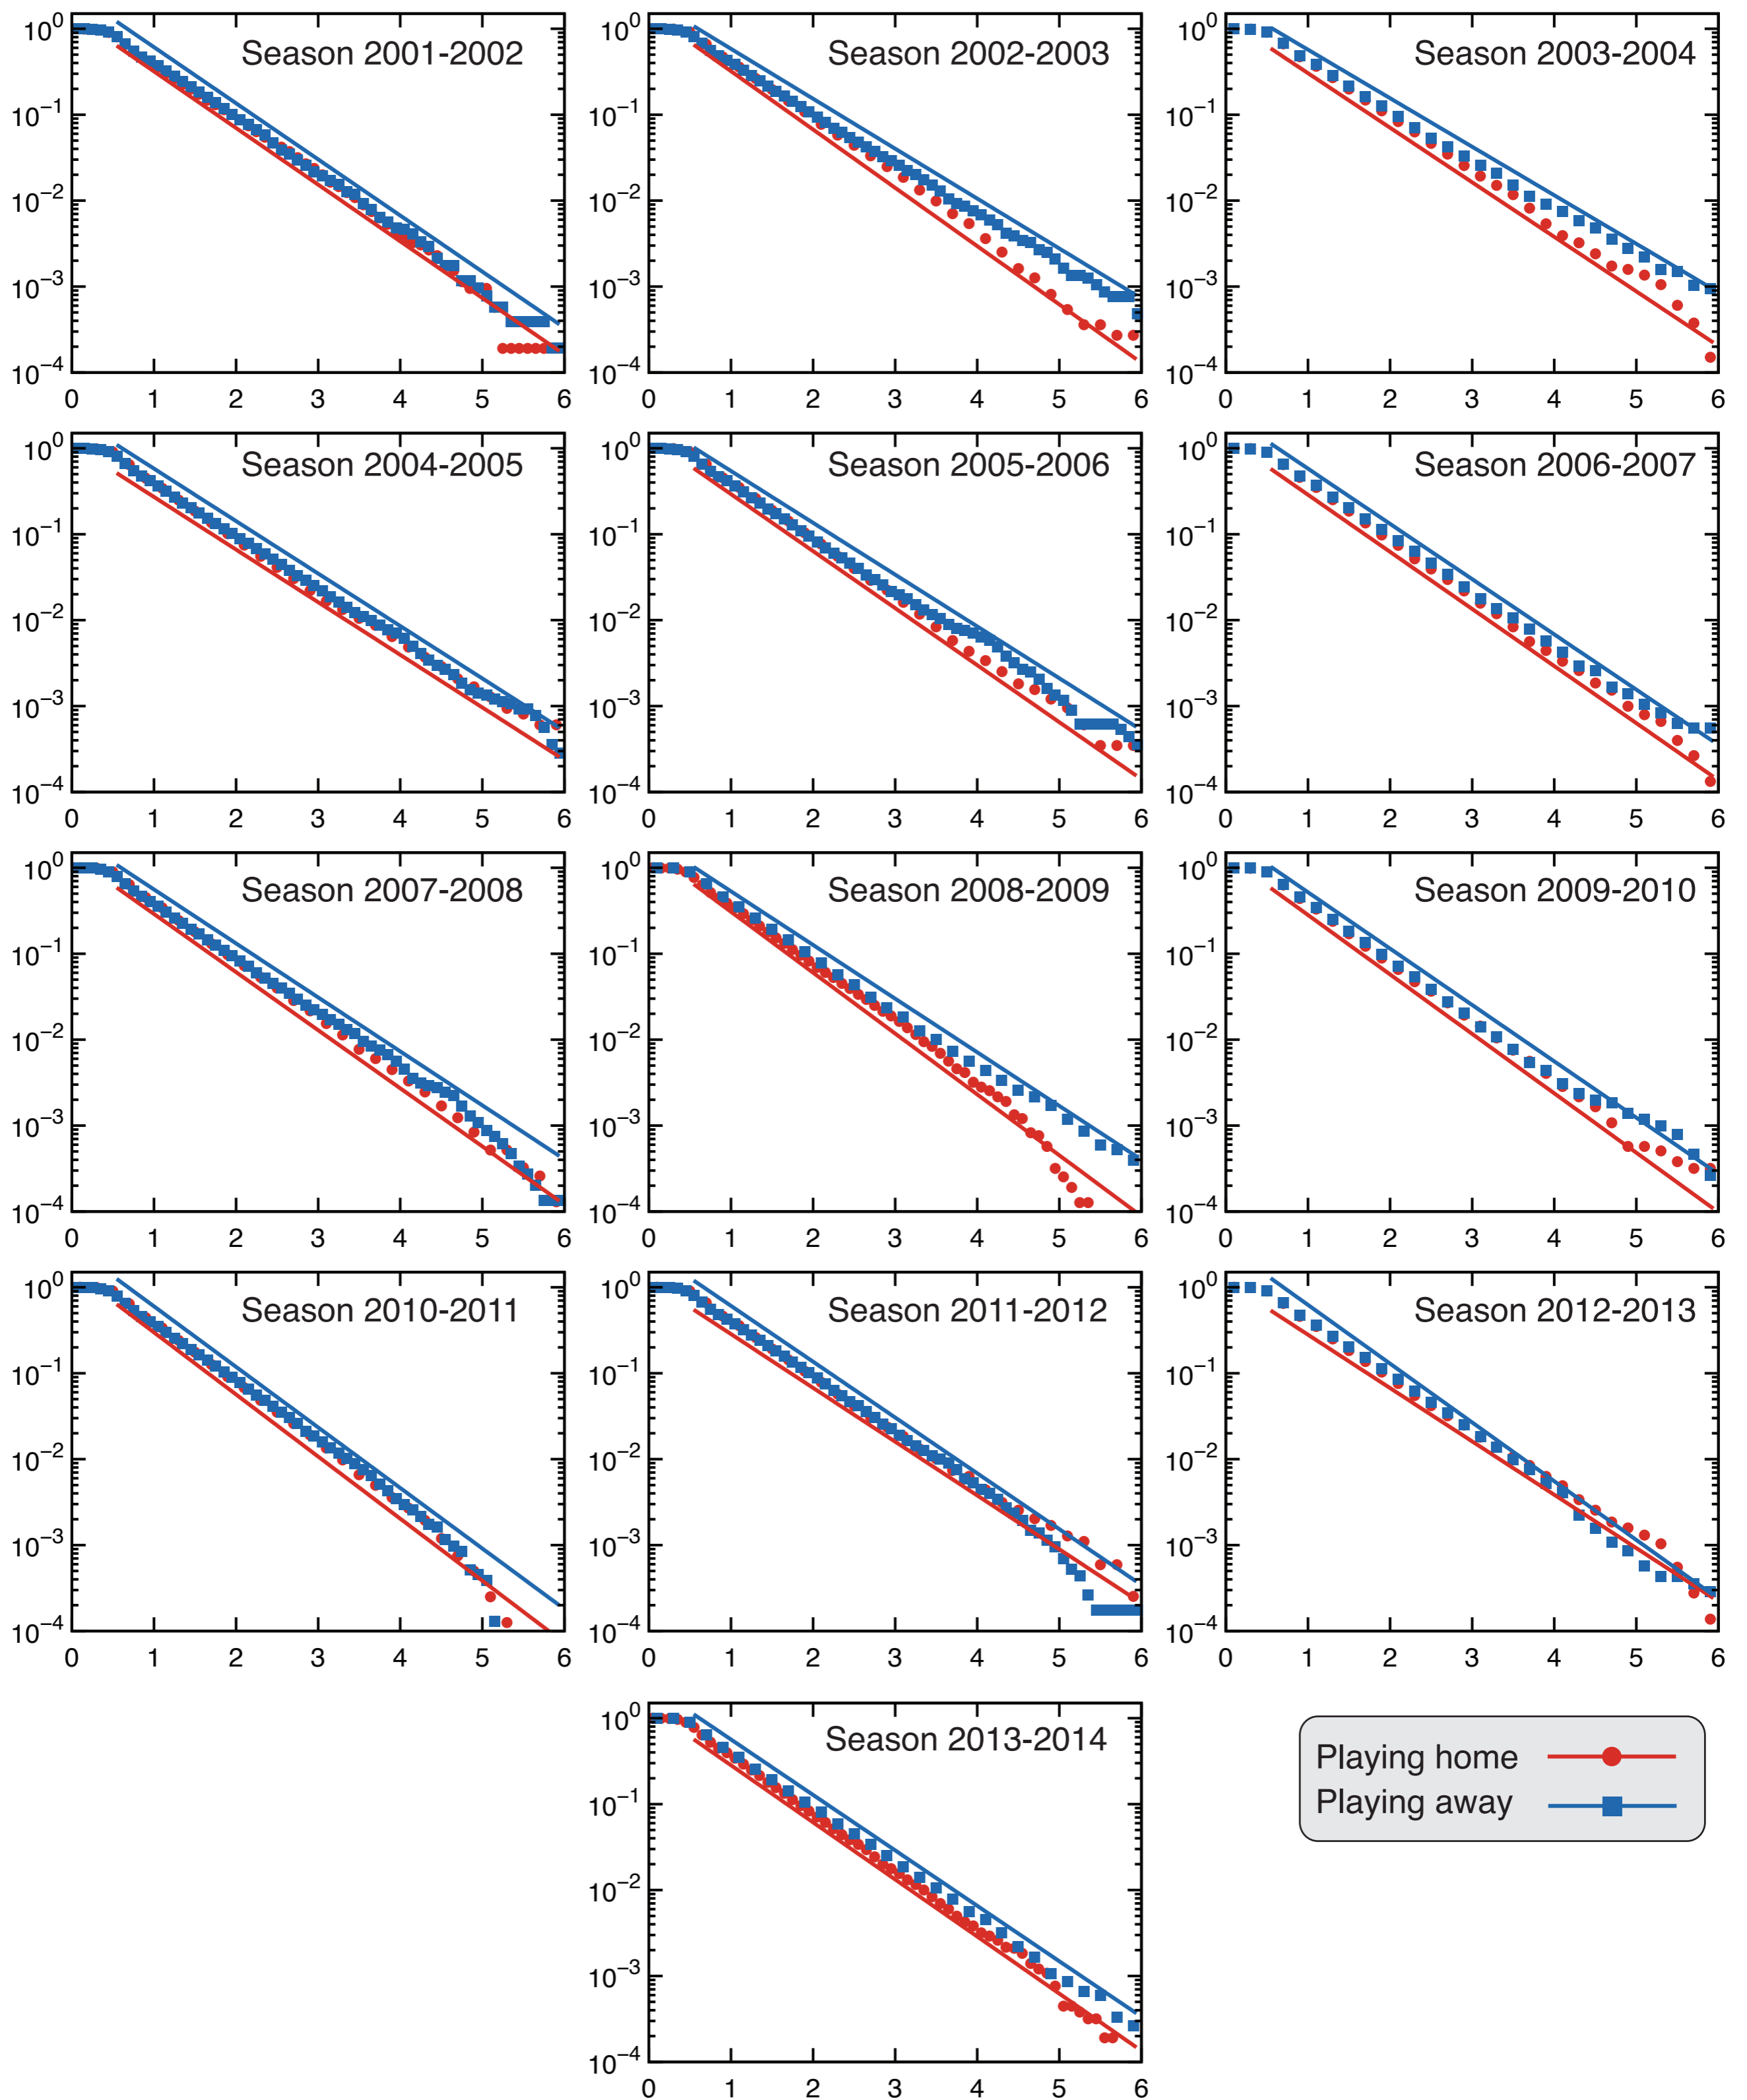

Cumulative distributions

Time intervals between scores (minutes)
