# Supplementary material for: The Advantage of Playing Home in NBA: Microscopic, Team-Specific and Evolving Features
Source: PubMed Central journal article supplement (PMC4807825; doi:10.1371/journal.pone.0152440), 2016-03-25
Supplement: pone.0152440.s008.pdf [file pone.0152440.s008.pdf]

# Seasons 2004-05 to 2013-14

Cumulative distributions

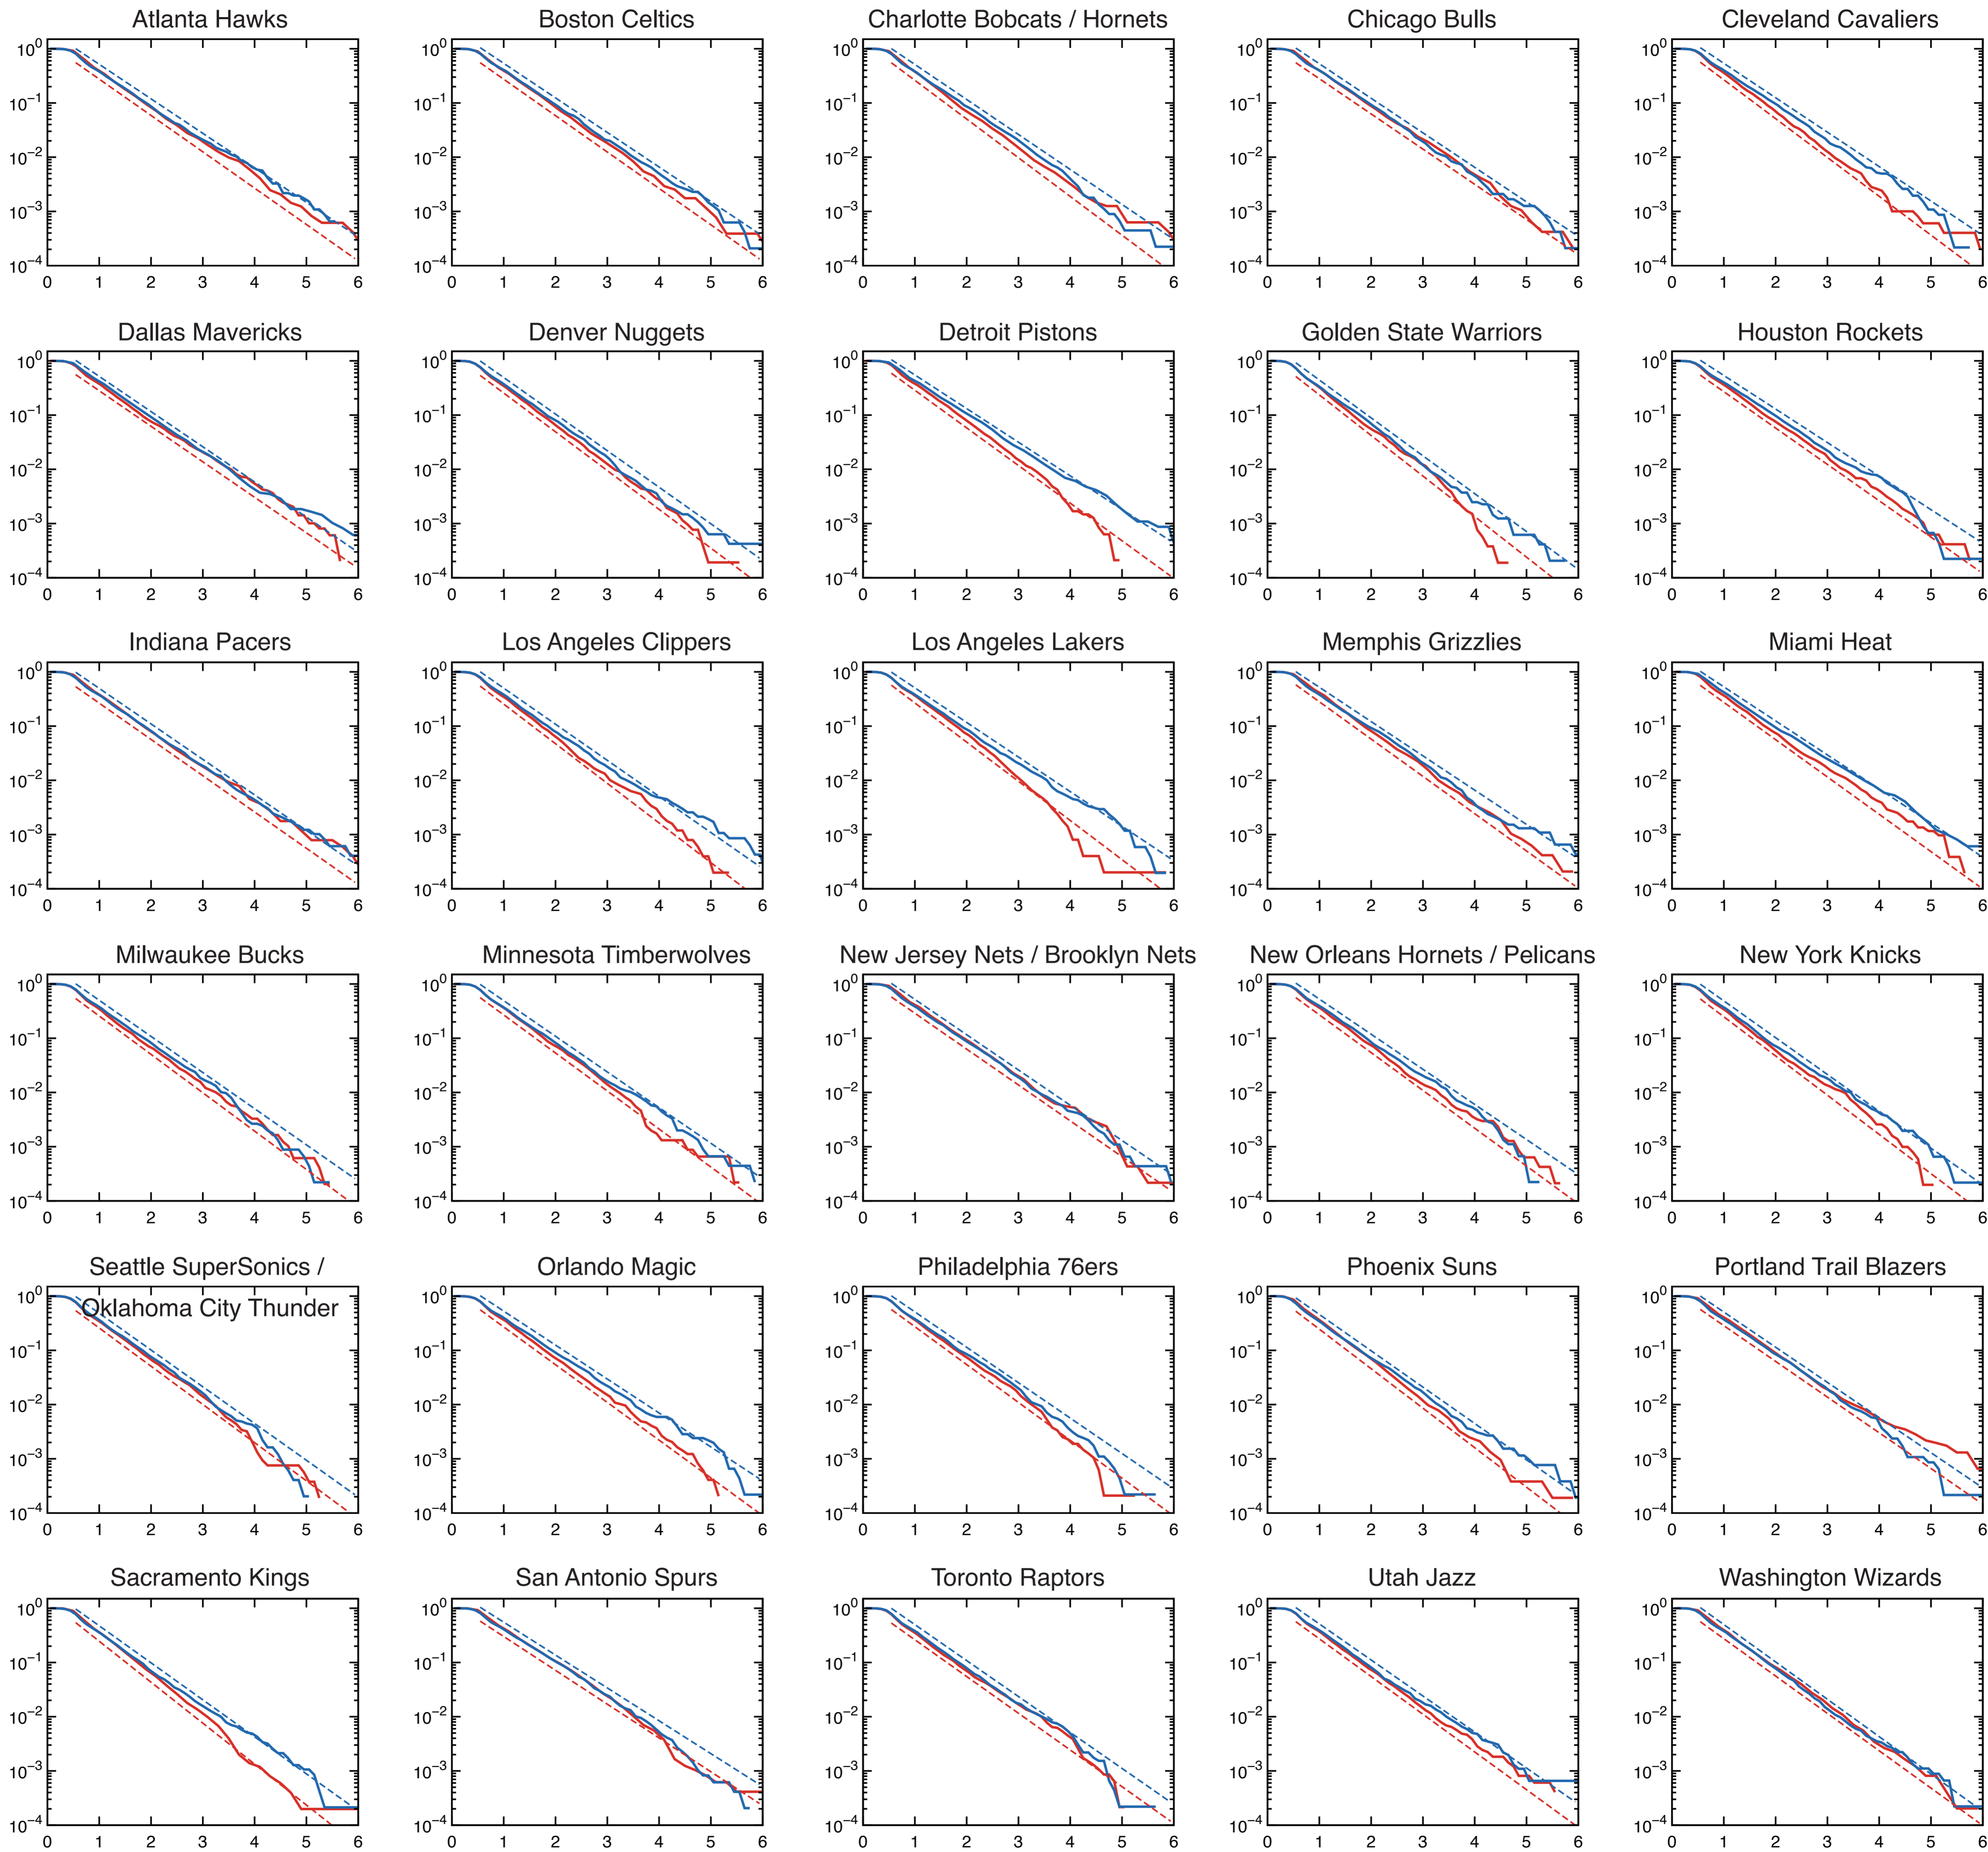

Playing home — (red line)  
Playing away — (blue line)

Time intervals between scores (minutes)
